# Supplementary material
Source: MDPI journal article supplement (https://www.mdpi.com/2079-6412/10/4/423)
Supplement: s1 [file s1]

# Supplementary Materials: In-Situ Ellipsometric Study of the Optical Properties of LTL-Doped Thin Film Sensors for Copper(II) Ion Detection

Dervil Cody <sup>1,\*</sup>, Tsvetanka Babeva <sup>2</sup>, Violeta Madjarova <sup>2</sup>, Anastasia Kharchenko <sup>3</sup>, Sabad-e-Gul <sup>1</sup>, Svetlana Mintova <sup>3</sup>, Christopher J. Barrett <sup>4</sup> and Izabela Naydenova <sup>1,\*</sup>

<sup>1</sup> Centre for Industrial and Engineering Optics, School of Physics and Clinical and Optometric Sciences, Technological University Dublin, Kevin Street, D08 NF82 Dublin 8, Ireland; sabadegul@gmail.com

<sup>2</sup> Institute for Optical Materials and Technologies, Bulgarian Academy of Sciences, 109, Acad. G. Bontchev Str., P.O. Box 95, 1113 Sofia, Bulgaria; babeva@iomt.bas.bg (T.B.); vmadjarova@iomt.bas.bg (V.M.)

<sup>3</sup> Laboratoire Catalyse & Spectrochimie, ENSICAEN, Normandie Université de Caen, CNRS, 6, boulevard du Maréchal Juin, 14050 Caen, France; anastasia.kharchenko@gmail.com (A.K.); svetlana.mintova@ensicaen.fr (S.M.)

<sup>4</sup> Department of Chemistry, McGill University, 801 Rue Sherbrooke W, Montréal, QC H3A 0B8, Canada; chris.barrett@mcgill.ca

\* Correspondence: dervil.cody@tudublin.ie (D.C.); izabela.naydenova@tudublin.ie (I.N.)

## 1. Contact Angle Measurement

The wettability of the uncoated and coated films was estimated using a First Ten Angstroms (FTA200, US) surface energy analyser. A water drop of definite volume was dropped on the sample surface in the horizontal position. The drop formation and final shape were recorded with a high speed camera and the image processed by computer. Drop shape was calculated in terms of the contact angle between the substrate surface and a tangent from the edge to the contour of the drop. Angles  $<90^\circ$  indicates a hydrophilic surface while angles  $>90^\circ$  indicate a hydrophobic surface. The mean of three values were reported for the experiment.

The results from the characterisation of the films hydrophobicity are presented in Figure S1.

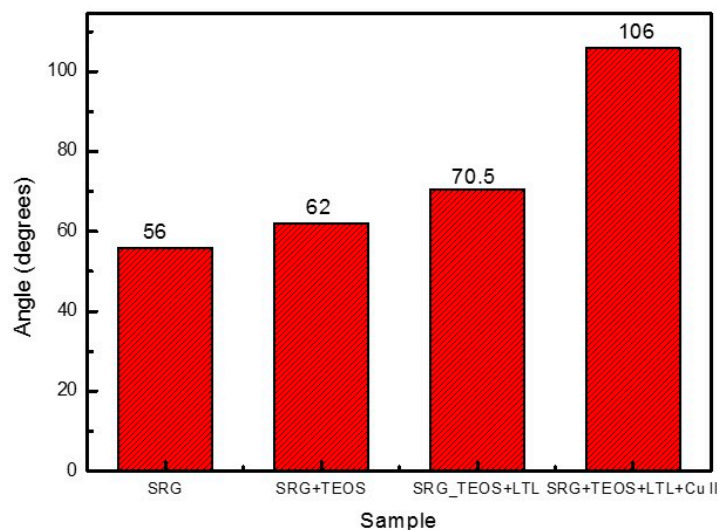

**Figure S1.** Contact angle results for uncoated and coated films: SRG-surface relief grating; SRG-TEOS-sol-gel coated surface relief grating; SRG-TEOS-LTL-zeolite-doped sol-gel coated surface relief grating; SRG-TEOS-LTL-Cu II zeolite-doped sol-gel coated surface relief grating exposed to 4 mM  $\text{Cu}^{2+}$  solution.

## 2. Extinction Coefficient of the Films

The calculated extinction coefficients,  $k$ , for the films in air, water and 4 mM  $\text{Cu}^{2+}$  solution are presented in Table S1. These values are averaged over three different samples and the deviations

from average value are in the range  $(0.6\text{--}1) \times 10^{-3}$  with exception of  $3 \times 10^{-3}$  for the TEOS-only (170 °C) samples. Immersion does not lead to some substantial change in  $k$ , nor is some trend observed. This demonstrates that the absorption of the films at the wavelengths used in this study is negligible.

**Table S1.** Extinction coefficients at wavelength of 633 nm.

| Film Type         | Air                         | Water       | 4 mM CuSO <sub>4</sub> |
|-------------------|-----------------------------|-------------|------------------------|
| TEOS (170 °C)     | $6.10^{-3} \pm 3.10^{-3}$   | 0           | $2.10^{-3}$            |
| TEOS (320 °C)     | $2.10^{-3} \pm 1.10^{-3}$   | 0           | 0                      |
| TEOS-LTL (170 °C) | $1.10^{-3} \pm 6.10^{-4}$   | $6.10^{-4}$ | $9.10^{-4}$            |
| TEOS-LTL (320 °C) | $1.3.10^{-3} \pm 7.10^{-4}$ | $2.10^{-3}$ | $3.10^{-3}$            |

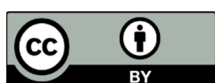

© 2020 by the authors. Licensee MDPI, Basel, Switzerland. This article is an open access article distributed under the terms and conditions of the Creative Commons Attribution (CC BY) license (<http://creativecommons.org/licenses/by/4.0/>).
